# Supplementary material for: A conceptual model to predict uranium removal from aqueous solutions in water–rock systems associated with low- and intermediate-level radioactive waste disposal
Source: Royal Society of Chemistry journal article supplement (doi:10.1039/c6ra26773d), 2017-01-01
Supplement: c6ra26773d1.pdf [file c6ra26773d1.pdf]

1 Figure S1: Batch adsorption experiments showing the difference in U(VI) sorption to  
2 quartz (Qtz), sandstone (SS), and welded tuff (BVG) with (open circles) and without  
3 (black circles) the addition of sodium bicarbonate to solution.

4

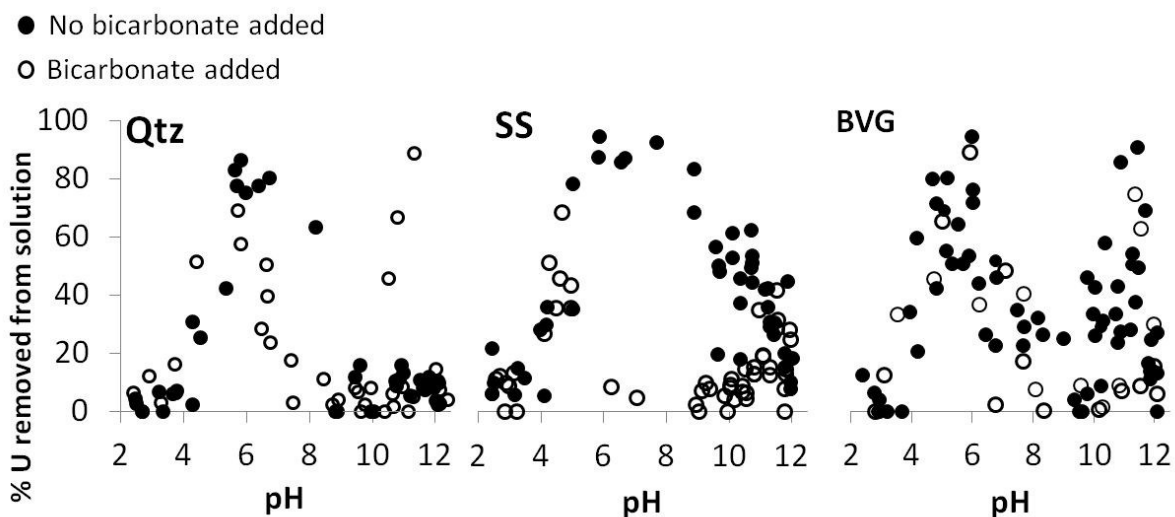

5

6

7

8

9 Figure S2: Batch adsorption experiments showing how the type of geosorbent affects  
10 the sorption of U from solution as a function of pH. The geosorbents used were quartz  
11 (Qtz), sandstone (SS), and welded tuff (BVG) and experiments were conducted without  
12 (A) and with (B) the addition of sodium bicarbonate at 10 ppb, 0.1 ppm, 1 ppm, and 10  
13 ppm U.

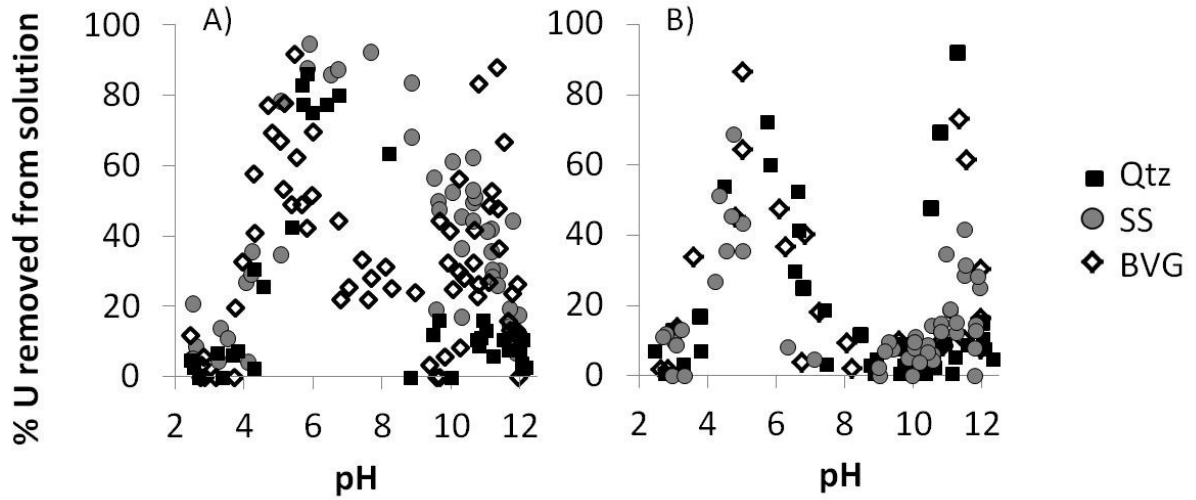

14  
15  
16  
17  
18
